# Supplementary material for: PCLLA-nanoHA Bone Substitute Promotes M2 Macrophage Polarization and Improves Alveolar Bone Repair in Diabetic Environments
Source: MDPI journal article supplement (doi:10.3390/jfb14110536), 2023-10-30
Supplement: s1 [file s1]

Supplementary Materials

# PCLLA-nanoHA Bone Substitute Promotes M2 Macrophage Polarization and Improves Alveolar Bone Repair in Diabetic Environments

Dandan Wang <sup>1,†</sup>, Ling Wei <sup>2,†</sup>, Jialin Hao <sup>3,†</sup>, Weifeng Tang <sup>2</sup>, Yuan Zhou <sup>4,\*</sup>, Chenguang Zhang <sup>5,\*</sup> and Jinming Wang <sup>5,\*</sup>

<sup>1</sup> Department of Pediatric Dentistry, Peking University School and Hospital of Stomatology, Beijing 100081, China; wangdandankq@pkuss.bjmu.edu.cn

<sup>2</sup> Third Clinical Division, Peking University School and Hospital of Stomatology, Beijing 100081, China; v0mysun@163.com (L.W.); tangweifeng@126.com (W.T.)

<sup>3</sup> Department of Prosthodontics, Stomatological Hospital and Dental School of Tongji University, Shanghai Engineering Research Center of Tooth Restoration and Regeneration, Shanghai 200072, China; jialinhao8883@126.com

<sup>4</sup> Shenzhen Stomatological Hospital, Southern Medical University, 1092 Jianshe Road, Luohu District, Shenzhen 518001, China

<sup>5</sup> Guangdong Provincial Key Laboratory of Stomatology, Department of Oral Implantology, Guanghua School of Stomatology, Hospital of Stomatology, Sun Yat-sen University, Guangzhou 510275, China

\* Correspondence: zhouyuan2411@gmail.com (Y.Z.); zhangchg9@mail.sysu.edu.cn (C.Z.); wjinm@mail.sysu.edu.cn (J.W.)

† These authors contributed equally to this work.

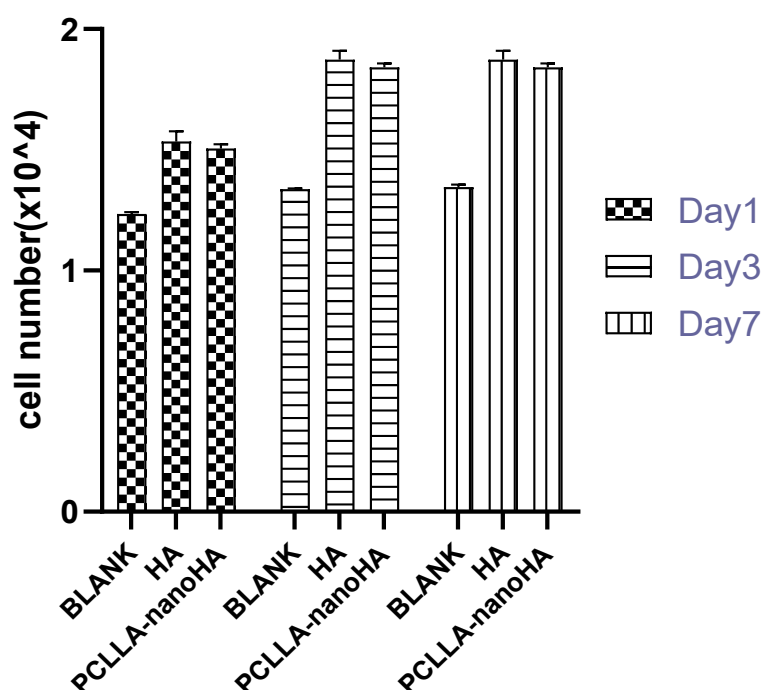

**Figure S1.** Cell viability and proliferation determined by land CCK-8 assay. No significant differences in cell proliferation were found among the various group by CCK-8 assay after 1, 3 or 7 days.

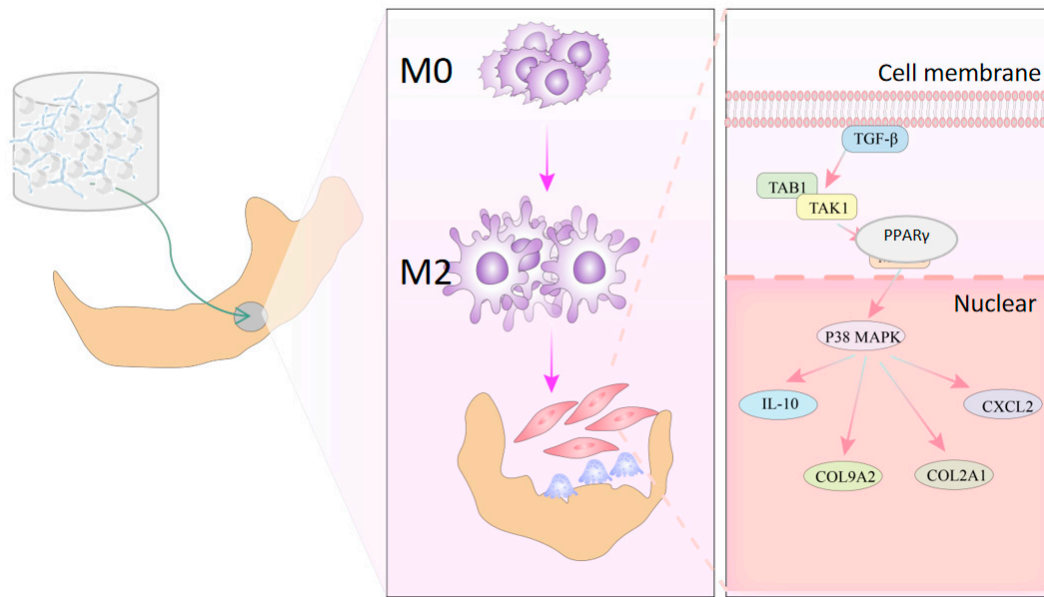

**Figure S2.** (A) Scheme of PCLLA-nanoHA material promotes M2 polarization of macrophages, partly through the enrichment of the TGF- $\beta$  and PPAR $\gamma$  signaling pathways.
